# Supplementary material
Source: PubMed Central journal article supplement (PMC9811992)
Supplement: ehp10611.s001.acco.pdf [file ehp10611.s001.acco.pdf]

**Note to readers with disabilities:** *EHP* strives to ensure that all journal content is accessible to all readers. However, some figures and Supplemental Material published in *EHP* articles may not conform to [508 standards](#) due to the complexity of the information being presented. If you need assistance accessing journal content, please contact [ehp508@niehs.nih.gov](mailto:ehp508@niehs.nih.gov). Our staff will work with you to assess and meet your accessibility needs within 3 working days.

### **Supplemental Material**

#### **Long-Term Exposure to Air Pollution and the Occurrence of Metabolic Syndrome and Its Components in Taiwan**

Yi-Chuan Chen, Wei-Shan Chin, Shih-Chun Pan, Chih-Da Wu, and Yue-Liang Leon Guo

#### **Table of Contents**

**Table S1.** Number of groups in which a participant was enrolled and event occurrence in the present study based on the MJ Health Database Study Population between 2006 and 2016, Taiwan.

**Table S2.** Distribution of annual average concentrations of PM<sub>2.5</sub> and NO<sub>2</sub> by region between 2005 and 2015, Taiwan.

**Table S3.** Associations of PM<sub>2.5</sub> and NO<sub>2</sub> with metabolic syndrome and its components between 2006 and 2016, Taiwan, with and without adjustment for baseline body mass index.

**Table S4.** Associations of PM<sub>2.5</sub> and NO<sub>2</sub> with metabolic syndrome and its components between 2006 and 2016, Taiwan, with and without adjustment for sleeping time.

**Table S5.** Correlation between PM<sub>2.5</sub> and NO<sub>2</sub> at the township level between 2005 and 2015, Taiwan.

**Figure S1.** Regions of Taiwan. Western Taiwan was essentially the combination of northern, central, and southern regions. Western Taiwan and eastern region are separated by high-rise mountains. This figure was created using the QGIS Desktop software (version 3.22; Open Source Geospatial Foundation, OSGeo).

**Figure S2.** Annual mean concentrations of PM<sub>2.5</sub> (µg/m<sup>3</sup>) and NO<sub>2</sub> (ppb) stratified by regions in the cohorts of metabolic syndrome and its components between 2005 and 2015, Taiwan (N = 93,771). Summary data found in Excel Table S1.

**Figure S3.** Associations between exposure to PM<sub>2.5</sub>, NO<sub>2</sub> and incident metabolic syndrome and its components between 2006 and 2016, in Taiwan, stratified by sex and age (adjusted HR and confidence intervals graphed). Summary data found in Excel Table S2.

**Additional File-** Excel Document

**Table S1.** Number of groups in which a participant was enrolled and event occurrence in the present study based on the MJ Health Database Study Population between 2006 and 2016, Taiwan.

| Number of groups in which participants were enrolled | Enrollment    | Event occurrence |
|------------------------------------------------------|---------------|------------------|
|                                                      | n (%)         | n (%)            |
| 0                                                    | -             | 78,786 (84.0)    |
| 1                                                    | 4,766 (5.1)   | 9,969 (10.6)     |
| 2                                                    | 10,076 (10.7) | 3,544 (3.8)      |
| 3                                                    | 17,203 (18.3) | 1,130 (1.2)      |
| 4                                                    | 27,154 (29.0) | 284 (0.3)        |
| 5                                                    | 34,572 (36.9) | 58 (0.1)         |
| Development of MetS <sup>a</sup>                     | 76,349 (81.4) | 9,898 (10.6)     |
| Total                                                | 93,771 (100)  | -                |

Note: Enrollment in each of six groups was according to participants' baseline status for each component of MetS. For each specific component, only those negative for it were included, e.g., those without abdominal obesity were included in the survival analysis for the development of abdominal obesity, etc. There were 36.9% (n = 34,572) of participants were having zero positive component and included in all five groups. Enrollment in one group did not preclude enrollment in other groups. "Event occurrence" refers to negativity to positivity in a specific component, i.e., abdominal obesity (having a waist circumference of  $\geq 90$  cm in men and  $\geq 80$  cm in women), elevated TG (having a TG level of  $\geq 150$  mg/dL or receiving drug treatment for hypertriglyceridemia), reduced HDL-C (having a HDL-C level of  $< 40$  mg/dL [ $1.0$  mmol/L] in males and  $< 50$  mg/dL [ $1.3$  mmol/L] in females or receiving drug treatment for decreased HDL-C), elevated BP (having a systolic BP level of  $\geq 130$  and/or diastolic BP level of  $\geq 85$  mmHg or receiving drug treatment for hypertension), elevated FBG (having an FBG level of  $\geq 100$  mg/dL or receiving drug treatment for hyperglycemia), or the occurrence of MetS (the presence of any  $\geq 3$  of the above components).

<sup>a</sup> Missing information on covariates were initially represented by the previous value available of each participant. Participants without available value for representation are not eligible for data analysis depends on the covariates in the models, leading to different eligible numbers of participants in different models in Table 3, Table S3, and Table S4.

**Table S2.** Distribution of annual average concentrations of PM<sub>2.5</sub> and NO<sub>2</sub> by region between 2005 and 2015, Taiwan.

|                                        | North | Middle | South | East |
|----------------------------------------|-------|--------|-------|------|
| PM <sub>2.5</sub> (µg/m <sup>3</sup> ) |       |        |       |      |
| mean                                   | 27.5  | 33.8   | 42.6  | 20.4 |
| SD                                     | 4.7   | 3.8    | 4.3   | 2.8  |
| median                                 | 28.2  | 34.2   | 42.8  | 21.6 |
| NO <sub>2</sub> (ppb)                  |       |        |       |      |
| mean                                   | 20.3  | 15.7   | 20.2  | 9.8  |
| SD                                     | 5.1   | 3.0    | 4.8   | 3.2  |
| median                                 | 19.7  | 16.0   | 21.1  | 10.5 |

Note: PM<sub>2.5</sub>, particulate matter with an aerodynamic diameter ≤2.5 µm; NO<sub>2</sub>, nitrogen dioxide; SD, standard deviation.

**Table S3.** Associations of PM<sub>2.5</sub> and NO<sub>2</sub> with metabolic syndrome and its components between 2006 and 2016, Taiwan, with and without adjustment for baseline body mass index.

| MetS and its components                                                               | With adjustment<br>for baseline body<br>mass index <sup>a</sup> |                   | Without adjustment<br>for baseline body<br>mass index |                   |
|---------------------------------------------------------------------------------------|-----------------------------------------------------------------|-------------------|-------------------------------------------------------|-------------------|
|                                                                                       | PM <sub>2.5</sub>                                               | NO <sub>2</sub>   | PM <sub>2.5</sub>                                     | NO <sub>2</sub>   |
|                                                                                       | Adjusted HR                                                     |                   | (95% CI)                                              |                   |
| Development of abdominal obesity in the<br>no abdominal obesity cohort                | n= 70,589<br>1.07 (1.01, 1.14)                                  | 0.97 (0.92, 1.03) | n= 70,594<br>1.06 (1.00, 1.13)                        | 0.98 (0.93, 1.04) |
| Development of elevated TG in the normal<br>TG cohort                                 | n= 68,727<br>1.17 (1.11, 1.23)                                  | 0.99 (0.94, 1.03) | n= 68,733<br>1.16 (1.10, 1.23)                        | 0.99 (0.94, 1.04) |
| Development of reduced HDL-C in the<br>normal HDL-C cohort                            | n= 67,587<br>1.09 (1.02, 1.17)                                  | 0.94 (0.88, 1.01) | n= 67,592<br>1.09 (1.01, 1.17)                        | 0.94 (0.88, 1.01) |
| Development of elevated BP in the normal<br>BP cohort                                 | n= 63,510<br>1.15 (1.09, 1.21)                                  | 1.04 (0.99, 1.10) | n= 63,514<br>1.15 (1.09, 1.21)                        | 1.05 (0.99, 1.10) |
| Development of elevated FBG in the normal<br>FBG cohort                               | n= 54,269<br>1.15 (1.10, 1.20)                                  | 1.03 (0.99, 1.07) | n= 54,274<br>1.15 (1.10, 1.20)                        | 1.04 (0.99, 1.08) |
| Development of MetS based on the number<br>of MetS risk factors exhibited at baseline | n= 69,456                                                       |                   | n= 69,460                                             |                   |
| 0                                                                                     | 0.99 (0.89, 1.12)                                               | 0.88 (0.76, 1.03) | 0.99 (0.89, 1.11)                                     | 0.87 (0.75, 1.01) |

|   |                   |                   |                   |                   |
|---|-------------------|-------------------|-------------------|-------------------|
| 1 | 1.12 (1.04, 1.20) | 1.01 (0.93, 1.10) | 1.12 (1.04, 1.21) | 1.02 (0.94, 1.11) |
| 2 | 1.14 (1.07, 1.22) | 1.10 (1.03, 1.18) | 1.12 (1.05, 1.19) | 1.14 (1.06, 1.21) |

Note: All estimates were calculated for every 10  $\mu\text{g}/\text{m}^3$  increase in  $\text{PM}_{2.5}$  and every 10-ppb increase in  $\text{NO}_2$  in the annual average concentrations, determined using time-dependent Cox regression. All models were two-pollutant model, adjusted by age, sex, marital status (single/divorced/separation/widowed, married/cohabitating), education level (junior high school and below, general and vocational high school, college, master degree and above), sleeping time per day (<6, 6–8, >8 hours), smoking habits (never smoking/former smoking, secondhand smoke exposure, frequent smoking/daily smoking), alcohol drinking habits (never drinking/former drinking, occasional drinking, frequent drinking/daily drinking), fried food consumption (none, little or  $\leq 1$  portion weekly, 2-3 portions weekly,  $\geq 4$  portions weekly), processed food consumption (none, little or  $\leq 1$  portion weekly, 2-3 portions weekly,  $\geq 4$  portions weekly), region (north, central, south), and the initial status—baseline waist circumference for abdominal obesity cohort, baseline TG for elevated TG cohort, baseline HDL-C for reduced HDL-C cohort, baseline systolic blood pressure and baseline diastolic blood pressure for elevated BP cohort, baseline FBG for elevated FBG cohort, and baseline number of components of MetS for MetS cohort.  $\text{PM}_{2.5}$ , particulate matter with an aerodynamic diameter  $\leq 2.5 \mu\text{m}$ ;  $\text{NO}_2$ , nitrogen dioxide; TG, triglyceride; HDL-C, high-density lipoprotein cholesterol; BP, blood pressure; FBG, fasting blood glucose; MetS, metabolic syndrome; n, number of participants without missing variables in each model; HR, hazard ratio; CI, confidence interval.

<sup>a</sup> Additional adjustment for baseline body mass index (<18.5, 18.5–24,  $\geq 24$ ).

**Table S4.** Associations of PM<sub>2.5</sub> and NO<sub>2</sub> with metabolic syndrome and its components between 2006 and 2016, Taiwan, with and without adjustment for sleeping time.

| MetS and its components                                                               | With adjustment<br>for sleeping time <sup>a</sup> |                   | Without adjustment<br>for sleeping time |                   |
|---------------------------------------------------------------------------------------|---------------------------------------------------|-------------------|-----------------------------------------|-------------------|
|                                                                                       | PM <sub>2.5</sub>                                 | NO <sub>2</sub>   | PM <sub>2.5</sub>                       | NO <sub>2</sub>   |
|                                                                                       | Adjusted HR                                       |                   | (95% CI)                                |                   |
| Development of abdominal obesity in the<br>no abdominal obesity cohort                | n= 70,589<br>1.07 (1.01, 1.14)                    | 0.97 (0.92, 1.03) | n= 70,608<br>1.07 (1.01, 1.14)          | 0.97 (0.92, 1.03) |
| Development of elevated TG in the normal<br>TG cohort                                 | n= 68,727<br>1.17 (1.11, 1.23)                    | 0.99 (0.94, 1.03) | n= 68,746<br>1.17 (1.11, 1.23)          | 0.98 (0.94, 1.03) |
| Development of reduced HDL-C in the<br>normal HDL-C cohort                            | n= 67,587<br>1.09 (1.02, 1.17)                    | 0.94 (0.88, 1.01) | n= 67,602<br>1.09 (1.02, 1.17)          | 0.94 (0.88, 1.01) |
| Development of elevated BP in the normal<br>BP cohort                                 | n= 63,510<br>1.15 (1.09, 1.21)                    | 1.04 (0.99, 1.10) | n= 63,526<br>1.15 (1.09, 1.21)          | 1.04 (0.99, 1.10) |
| Development of elevated FBG in the normal<br>FBG cohort                               | n= 54,269<br>1.15 (1.10, 1.20)                    | 1.03 (0.99, 1.07) | n= 54,281<br>1.15 (1.10, 1.20)          | 1.03 (0.99, 1.07) |
| Development of MetS based on the number<br>of MetS risk factors exhibited at baseline | n= 69,456                                         |                   | n= 69,469                               |                   |
| 0                                                                                     | 0.99 (0.89, 1.12)                                 | 0.88 (0.76, 1.03) | 0.99 (0.89, 1.12)                       | 0.88 (0.76, 1.02) |
| 1                                                                                     | 1.12 (1.04, 1.20)                                 | 1.01 (0.93, 1.10) | 1.12 (1.04, 1.20)                       | 1.01 (0.93, 1.10) |

---

Note: All estimates were calculated for every 10  $\mu\text{g}/\text{m}^3$  increase in  $\text{PM}_{2.5}$  and every 10-ppb increase in  $\text{NO}_2$  in the annual average concentrations, determined using time-dependent Cox regression. All models were two-pollutant model, adjusted by age, sex, baseline body mass index (<18.5, 18.5–24,  $\geq 24$ ), marital status (single/divorced/separation/widowed, married/cohabitating), education level (junior high school and below, general and vocational high school, college, master degree and above), smoking habits (never smoking/former smoking, secondhand smoke exposure, frequent smoking/daily smoking), alcohol drinking habits (never drinking/former drinking, occasional drinking, frequent drinking/daily drinking), fried food consumption (none, little or  $\leq 1$  portion weekly, 2-3 portions weekly,  $\geq 4$  portions weekly), processed food consumption (none, little or  $\leq 1$  portion weekly, 2-3 portions weekly,  $\geq 4$  portions weekly), region (north, central, south), and the initial status—baseline waist circumference for abdominal obesity cohort, baseline TG for elevated TG cohort, baseline HDL-C for reduced HDL-C cohort, baseline systolic blood pressure and baseline diastolic blood pressure for elevated BP cohort, baseline FBG for elevated FBG cohort, and baseline number of components of MetS for MetS cohort.  $\text{PM}_{2.5}$ , particulate matter with an aerodynamic diameter  $\leq 2.5 \mu\text{m}$ ;  $\text{NO}_2$ , nitrogen dioxide; TG, triglyceride; HDL-C, high-density lipoprotein cholesterol; BP, blood pressure; FBG, fasting blood glucose; MetS, metabolic syndrome; n, number of participants without missing variables in each model; HR, hazard ratio; CI, confidence interval.

<sup>a</sup> Additional adjustment for sleeping time per day (<6, 6–8, >8 hours).



**Table S5.** Correlation between PM<sub>2.5</sub> and NO<sub>2</sub> at the township level between 2005 and 2015, Taiwan.

| Spearman correlation coefficients between PM <sub>2.5</sub> and NO <sub>2</sub> | In the abdominal obesity development cohort | In the elevated TG development cohort | In the reduced HDL-C development cohort | In the elevated BP development cohort | In the elevated FBG development cohort | In the MetS development cohort |
|---------------------------------------------------------------------------------|---------------------------------------------|---------------------------------------|-----------------------------------------|---------------------------------------|----------------------------------------|--------------------------------|
| North <sup>a</sup>                                                              | 0.549                                       | 0.551                                 | 0.575                                   | 0.551                                 | 0.548                                  | 0.558                          |
| Central <sup>b</sup>                                                            | 0.463                                       | 0.461                                 | 0.468                                   | 0.484                                 | 0.464                                  | 0.456                          |
| South <sup>c</sup>                                                              | 0.688                                       | 0.691                                 | 0.697                                   | 0.683                                 | 0.692                                  | 0.688                          |
| Total                                                                           | 0.271                                       | 0.277                                 | 0.291                                   | 0.290                                 | 0.249                                  | 0.272                          |

Note: TG: triglyceride; HDL-C: high-density lipoprotein cholesterol; BP: blood pressure; FBG: fasting blood glucose; MetS: metabolic syndrome. All  $p < 0.001$ . The Spearman correlation coefficients between PM<sub>2.5</sub> and NO<sub>2</sub> were measured at the residence of township of participants in each cohort, including participants who were censored, developed and non-developed abdominal obesity, elevated TG, reduced HDL-C, elevated BP, elevated FBG and MetS.

<sup>a</sup> The northern region includes Taipei, New Taipei, Keelung, Hsinchu and Taoyuan Cities, and Hsinchu County.

<sup>b</sup> The central region includes Taichung City, and Miaoli, Changhua, Nantou and Yunlin Counties.

<sup>c</sup> The southern region includes Kaohsiung, Tainan and Chiayi Cities, and Chiayi and Pingtung Counties.

**Figure S1.** Regions of Taiwan. Western Taiwan was essentially the combination of northern, central, and southern regions. Western Taiwan and eastern region are separated by high-rise mountains. This figure was created using the QGIS Desktop software (version 3.22; Open Source Geospatial Foundation, OSGeo).

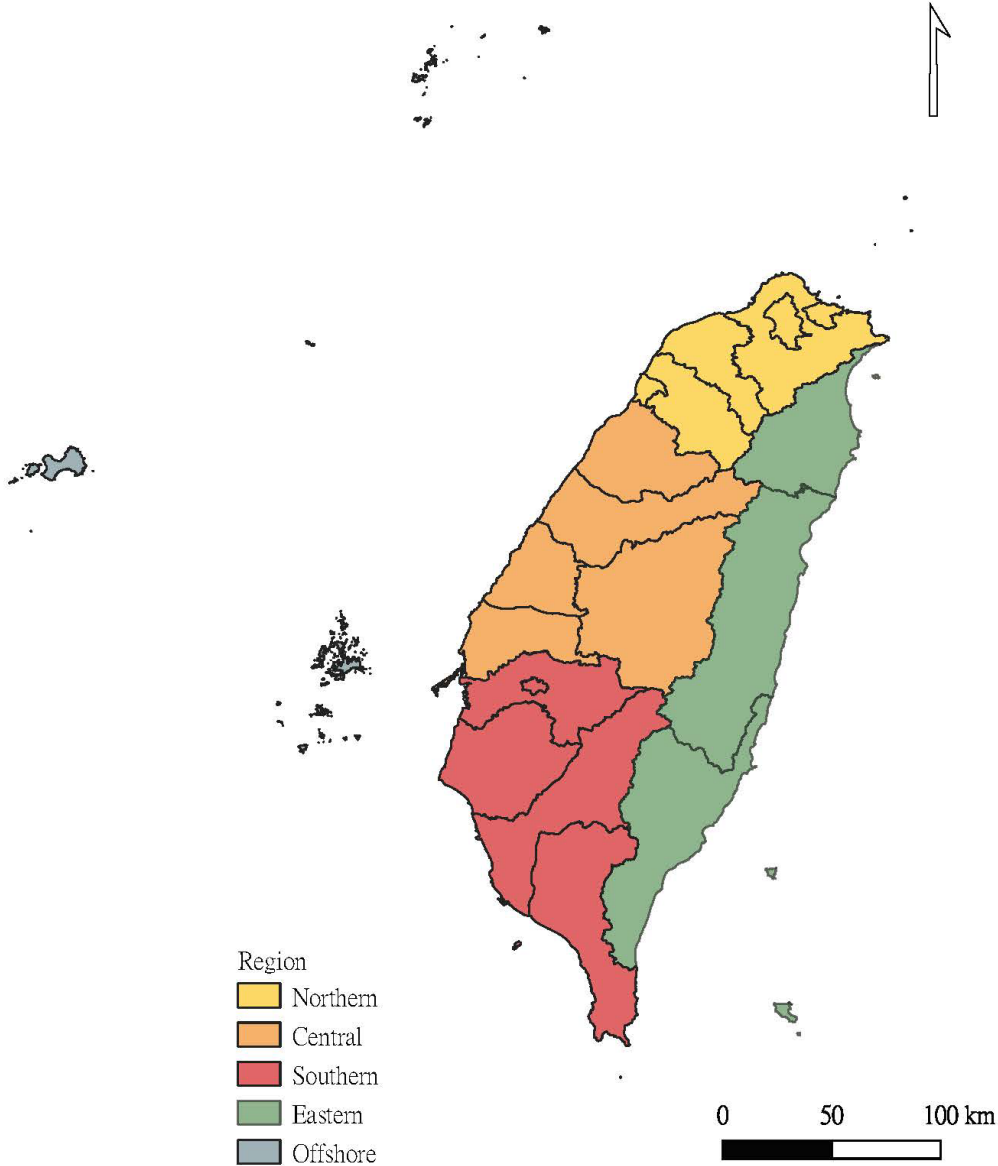

**Figure S2.** Annual mean concentrations of PM<sub>2.5</sub> (µg/m<sup>3</sup>) and NO<sub>2</sub> (ppb) stratified by regions in the cohorts of metabolic syndrome and its components between 2005 and 2015, Taiwan (N = 93,771). Summary data found in Excel Table S1.

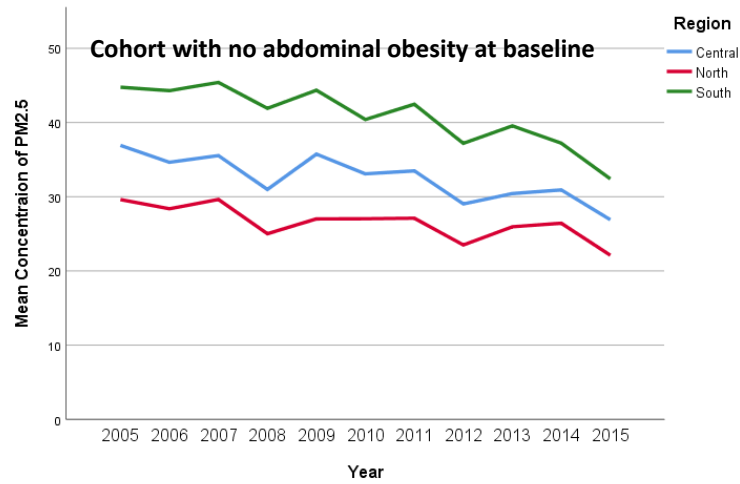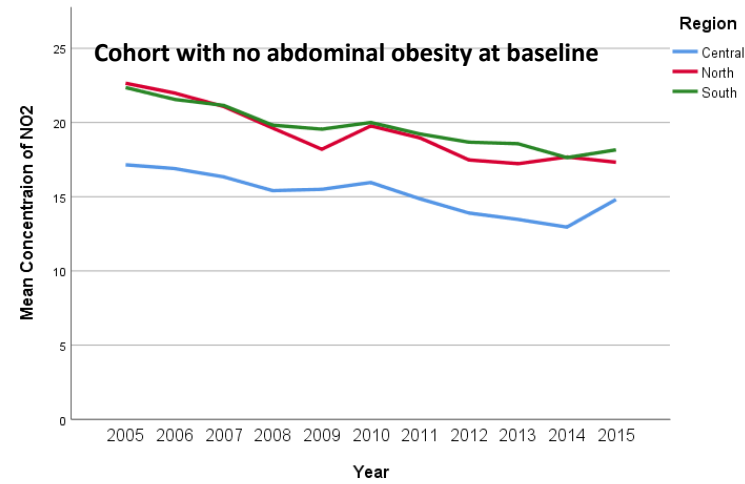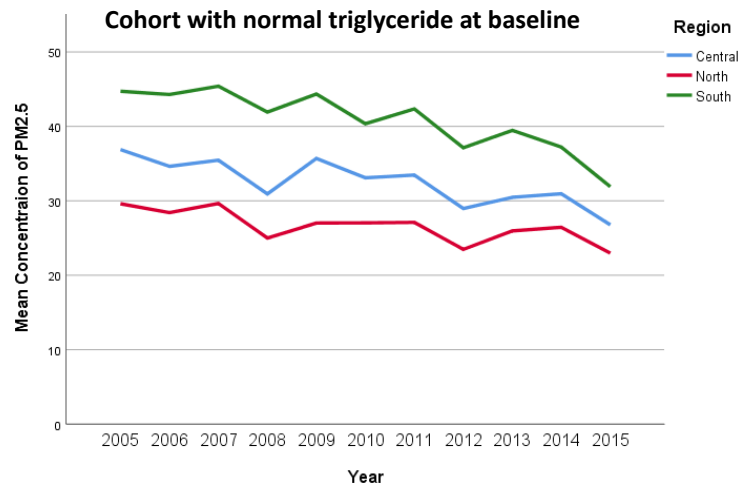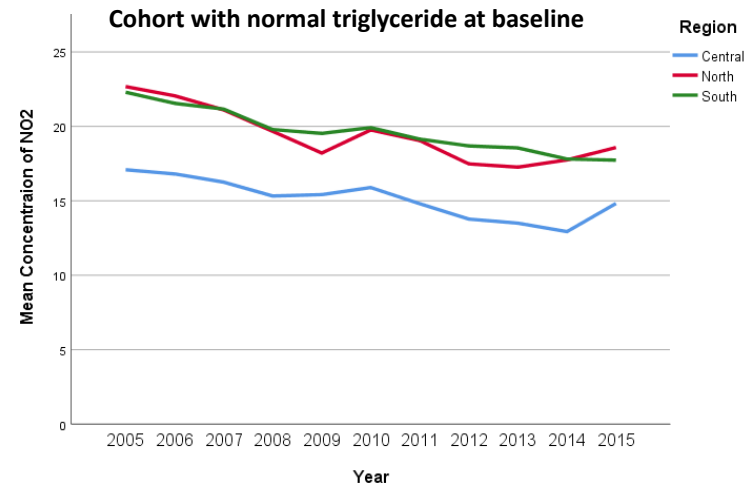

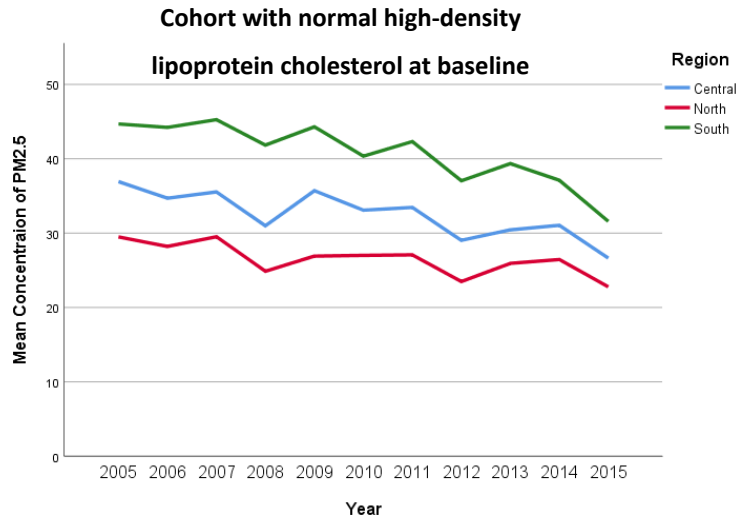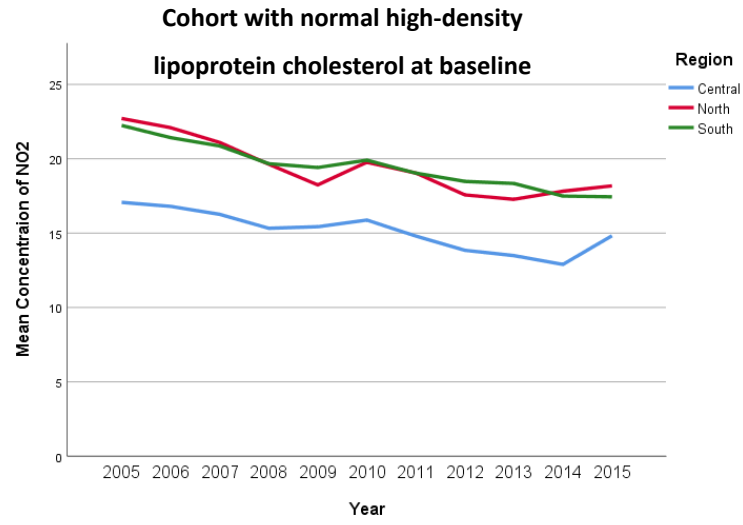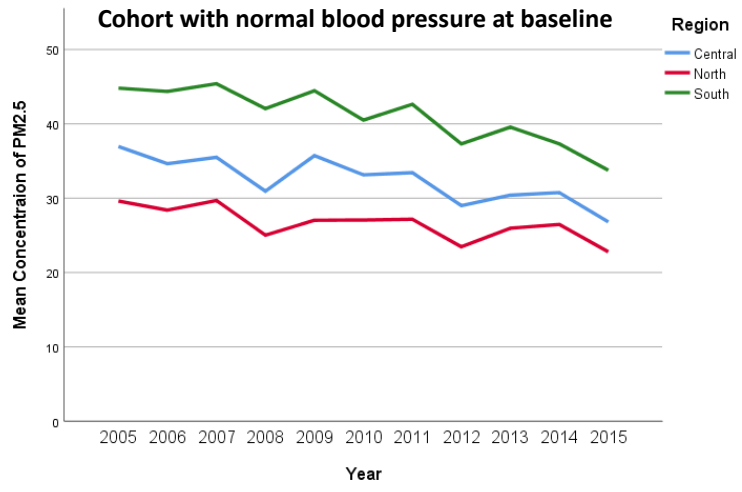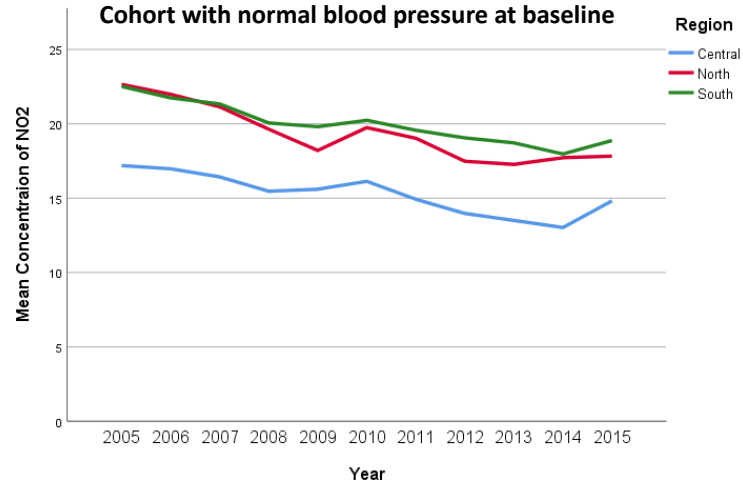

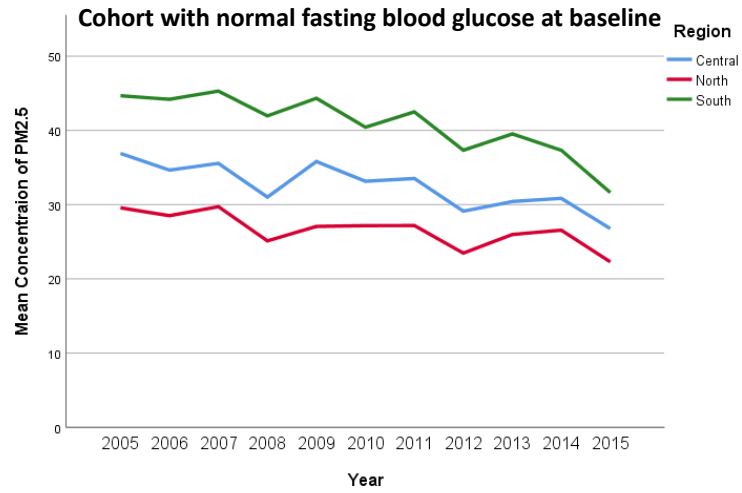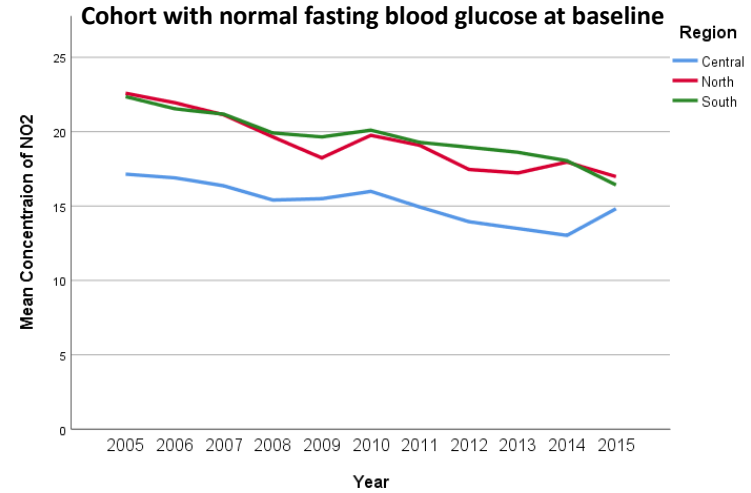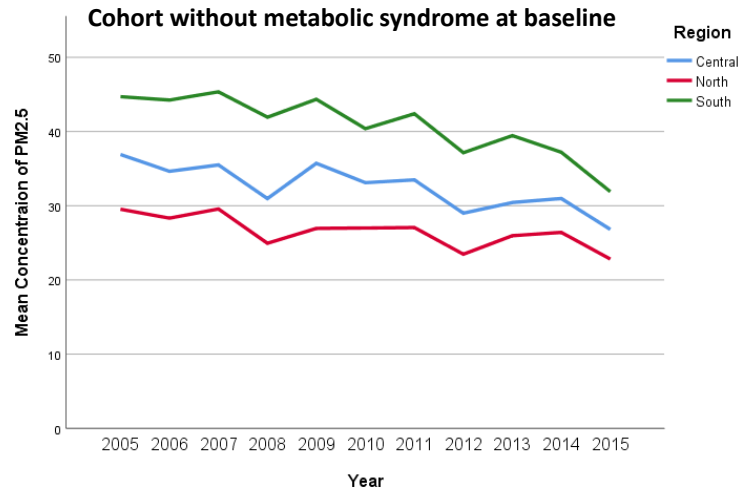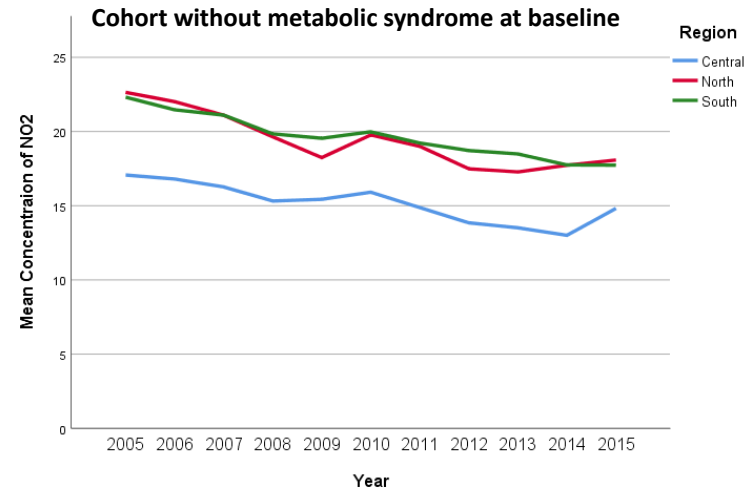

**Figure S3.** Associations between exposure to PM<sub>2.5</sub>, NO<sub>2</sub> and incident metabolic syndrome and its components between 2006 and 2016, in Taiwan, stratified by sex and age (adjusted HR and confidence intervals graphed). Summary data found in Excel Table S2.

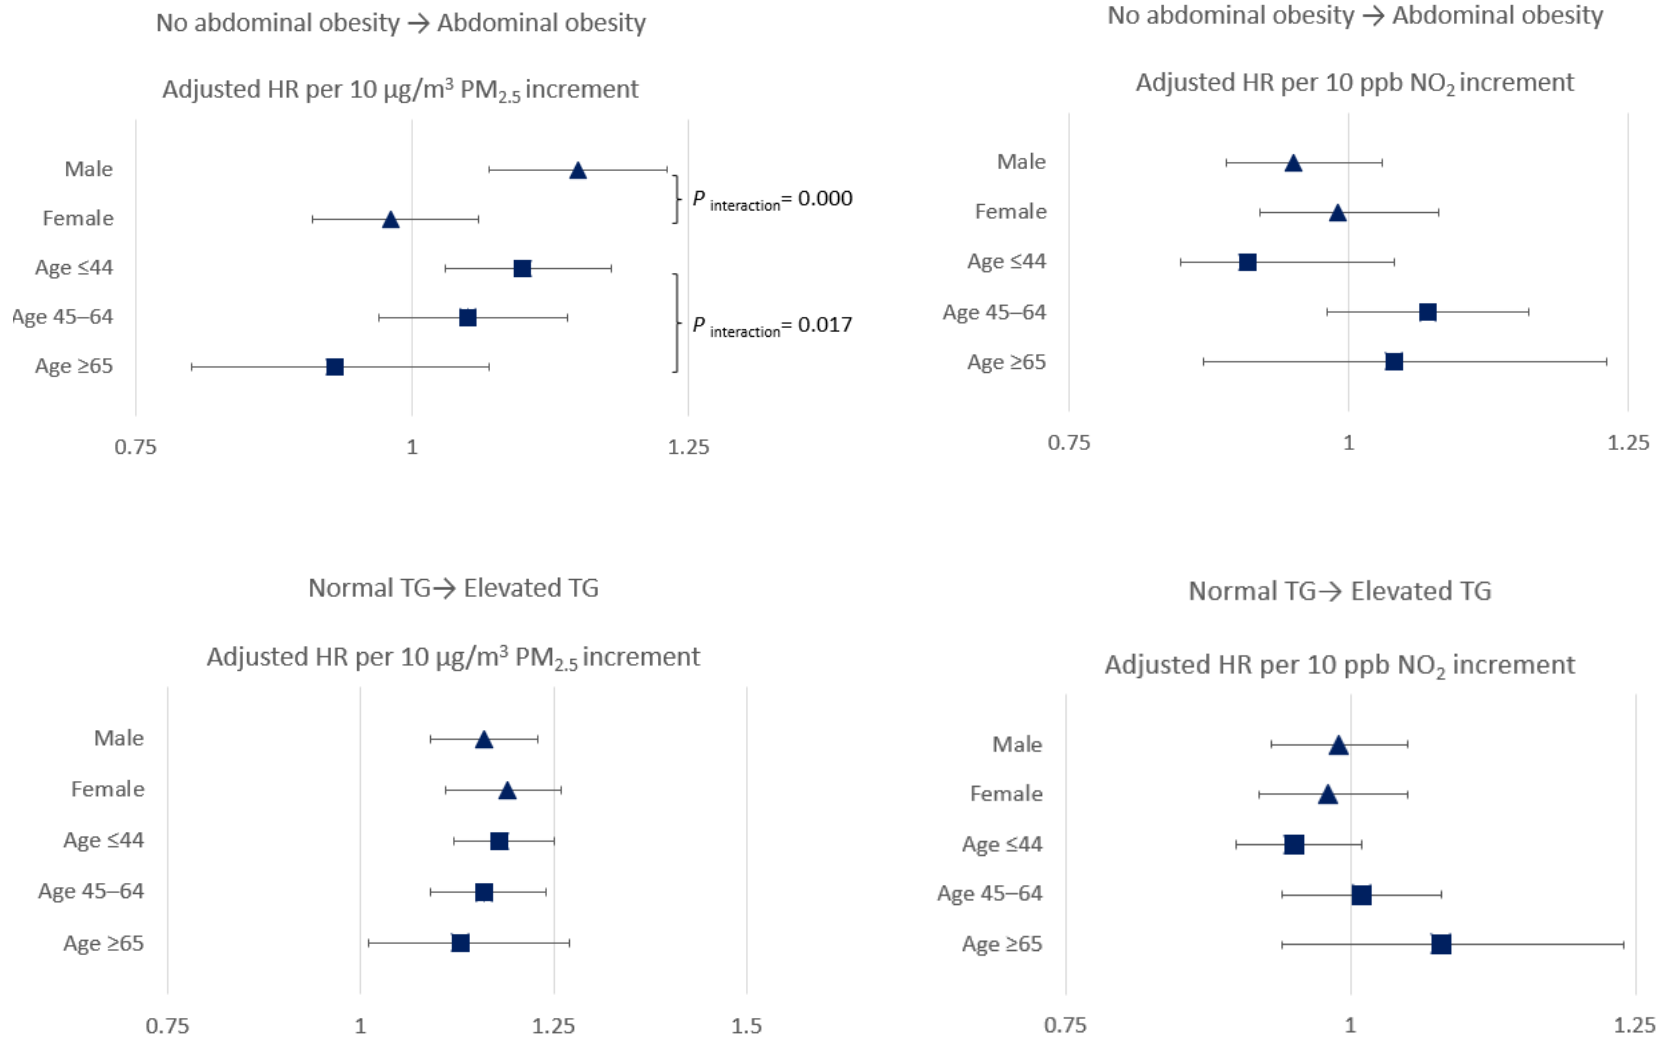

Normal HDL-C → Reduced HDL-C

Adjusted HR per 10  $\mu\text{g}/\text{m}^3$   $\text{PM}_{2.5}$  increment

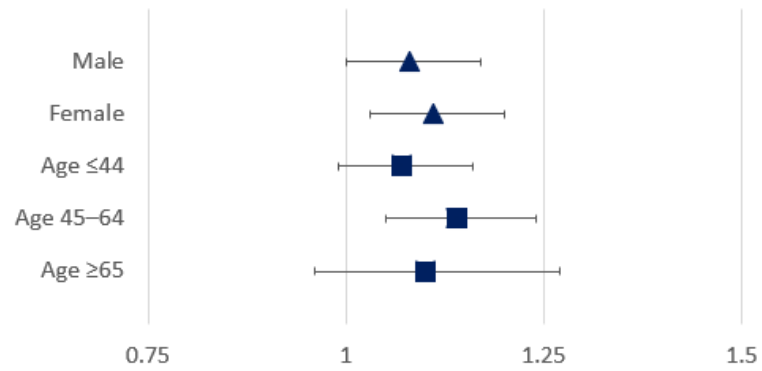

Normal HDL-C → Reduced HDL-C

Adjusted HR per 10 ppb  $\text{NO}_2$  increment

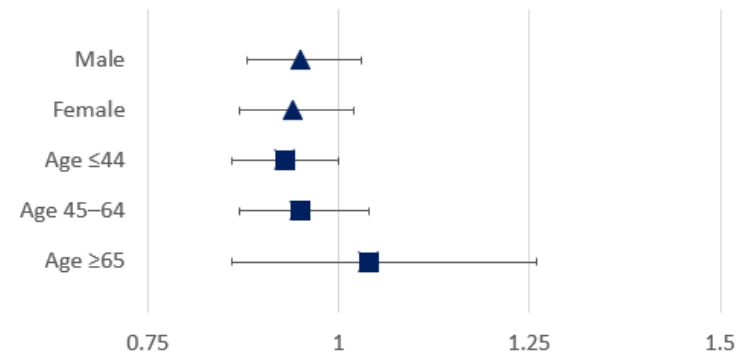

Normal BP → Elevated BP

Adjusted HR per 10  $\mu\text{g}/\text{m}^3$   $\text{PM}_{2.5}$  increment

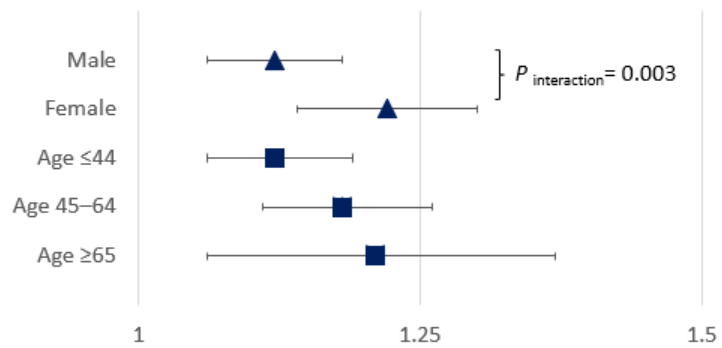

Normal BP → Elevated BP

Adjusted HR per 10 ppb  $\text{NO}_2$  increment

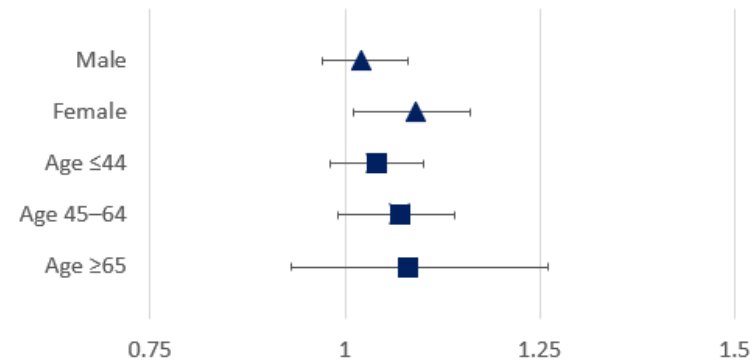

Normal FBG → Elevated FBG

Adjusted HR per 10  $\mu\text{g}/\text{m}^3$   $\text{PM}_{2.5}$  increment

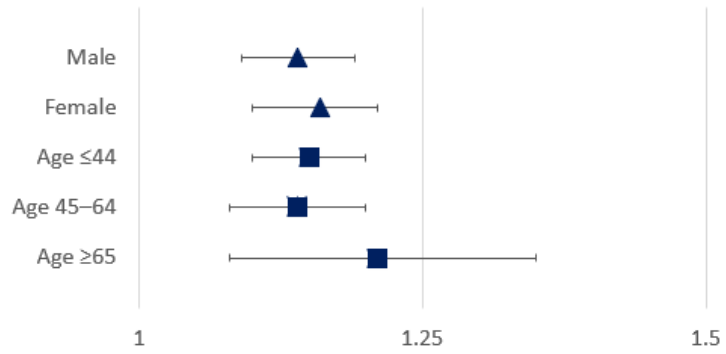

Normal FBG → Elevated FBG

Adjusted HR per 10 ppb  $\text{NO}_2$  increment

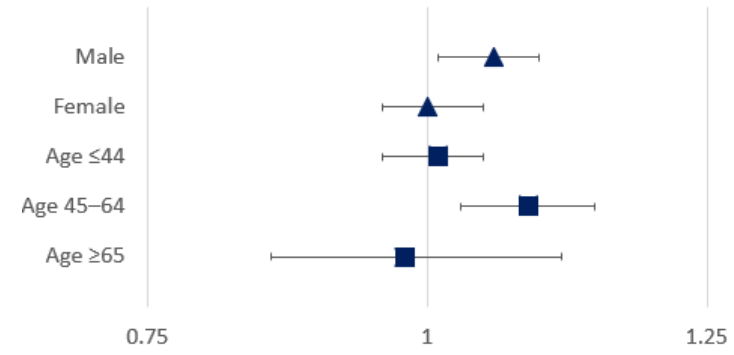

No component at baseline → MetS

Adjusted HR per 10  $\mu\text{g}/\text{m}^3$   $\text{PM}_{2.5}$  increment

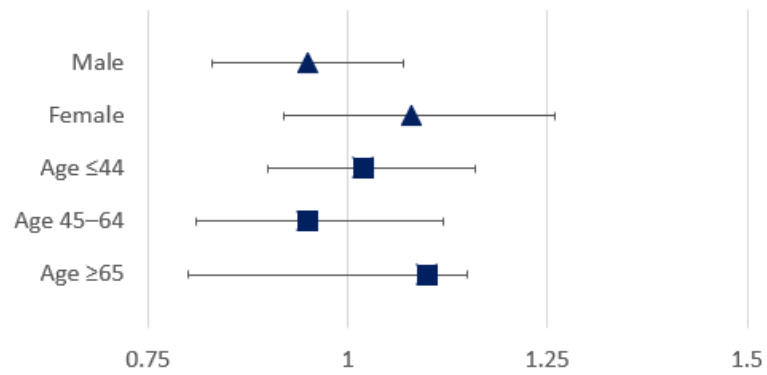

No component at baseline → MetS

Adjusted HR per 10 ppb  $\text{NO}_2$  increment

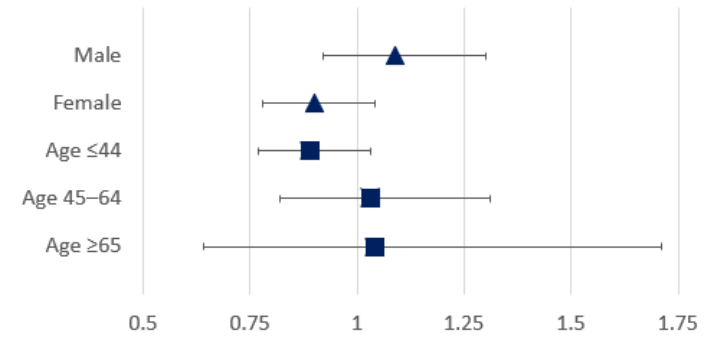



1 component at baseline → MetS

Adjusted HR per 10  $\mu\text{g}/\text{m}^3$   $\text{PM}_{2.5}$  increment

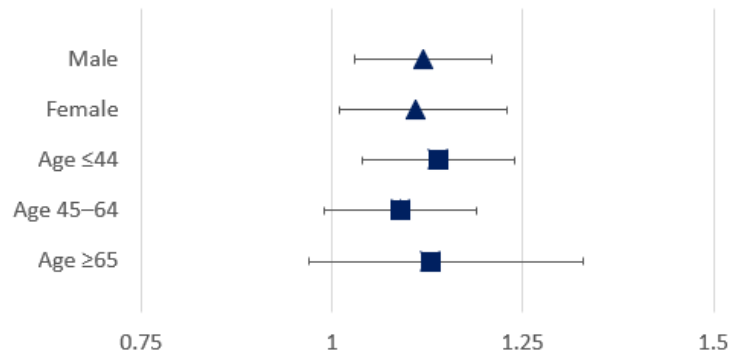

1 component at baseline → MetS

Adjusted HR per 10 ppb  $\text{NO}_2$  increment

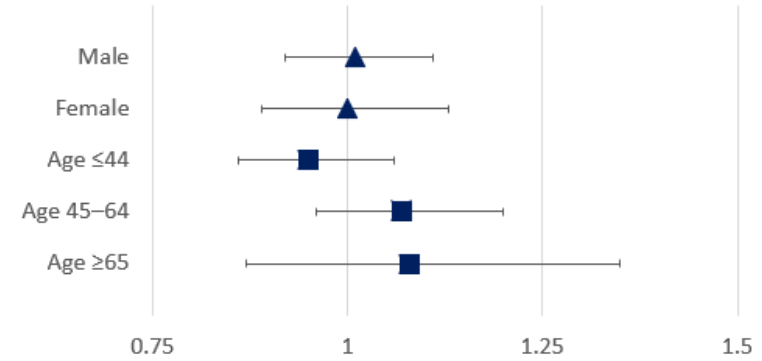

2 components at baseline → MetS

Adjusted HR per 10  $\mu\text{g}/\text{m}^3$   $\text{PM}_{2.5}$  increment

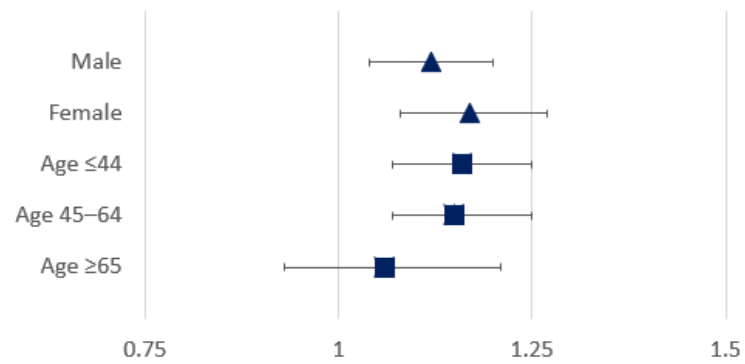

2 components at baseline → MetS

Adjusted HR per 10 ppb  $\text{NO}_2$  increment

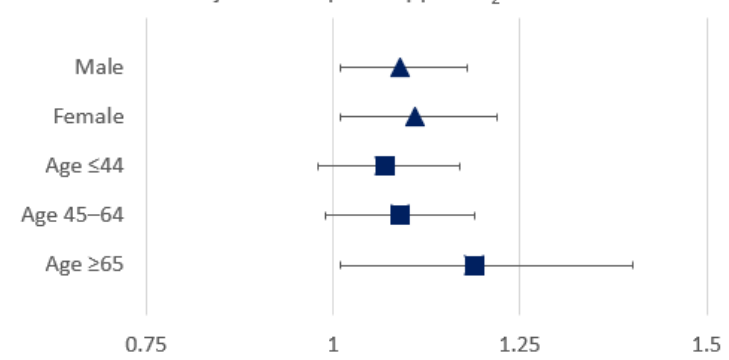

Note: All estimates were calculated for every 10  $\mu\text{g}/\text{m}^3$  increase in  $\text{PM}_{2.5}$  and every 10-ppb increase in  $\text{NO}_2$  in the annual average concentrations, determined using time-dependent Cox regression.  $P_{\text{interaction}}$  represented the likelihood ratio test for interaction between  $\text{PM}_{2.5}$ ,  $\text{NO}_2$ , sex, and age.  $P_{\text{interaction}}$  of greater than 0.05 were not shown. All models were two-pollutant model, adjusted by age, sex, baseline body mass index (<18.5, 18.5–24,  $\geq 24$ ), marital status (single/divorced/separation/widowed, married/cohabitating), education level (junior high school and below, general and vocational high school, college, master degree and above), smoking habits (never smoking/former smoking, secondhand smoke exposure, frequent smoking/daily smoking), alcohol drinking habits (never drinking/former drinking, occasional drinking, frequent drinking/daily drinking), sleeping time per day (<6, 6–8, >8 hours), regular exercise (none, little or < 1 hour weekly, 1-4 hours weekly or once per 2-3 days,  $\geq 5$  hours weekly or daily), fried food consumption (none, little or  $\leq 1$  portion weekly, 2-3 portions weekly,  $\geq 4$  portions weekly), processed food consumption (none, little or  $\leq 1$  portion weekly, 2-3 portions weekly,  $\geq 4$  portions weekly), region (north, central, south), and the initial status—baseline waist circumference for abdominal obesity cohort, baseline TG for elevated TG cohort, baseline HDL-C for reduced HDL-C cohort, baseline systolic blood pressure and baseline diastolic blood pressure for elevated BP cohort, baseline FBG for elevated FBG cohort, and baseline number of components of MetS for MetS cohort.  $\text{PM}_{2.5}$ , particulate matter with an aerodynamic diameter  $\leq 2.5 \mu\text{m}$ ;  $\text{NO}_2$ , nitrogen dioxide; TG, triglyceride; HDL-C, high-density lipoprotein cholesterol; BP, blood pressure; FBG, fasting blood glucose; MetS, metabolic syndrome; HR, hazard ratio; error bars, 95% confidence intervals.
