# Supplementary material
Source: PubMed Central journal article supplement (PMC9811992)
Supplement: ehp10611.smcontents.508.pdf [file ehp10611.smcontents.508.pdf]

**Note to readers with disabilities:** *EHP* strives to ensure that all journal content is accessible to all readers. However, some figures and Supplemental Material published in *EHP* articles may not conform to [508 standards](#) due to the complexity of the information being presented. If you need assistance accessing journal content, please contact [ehp508@niehs.nih.gov](mailto:ehp508@niehs.nih.gov). Our staff will work with you to assess and meet your accessibility needs within 3 working days.

### **Supplemental Material**

#### **Long-Term Exposure to Air Pollution and the Occurrence of Metabolic Syndrome and Its Components in Taiwan**

Yi-Chuan Chen, Wei-Shan Chin, Shih-Chun Pan, Chih-Da Wu, and Yue-Liang Leon Guo

#### **Table of Contents**

**Table S1.** Number of groups in which a participant was enrolled and event occurrence in the present study based on the MJ Health Database Study Population between 2006 and 2016, Taiwan.

**Table S2.** Distribution of annual average concentrations of PM<sub>2.5</sub> and NO<sub>2</sub> by region between 2005 and 2015, Taiwan.

**Table S3.** Associations of PM<sub>2.5</sub> and NO<sub>2</sub> with metabolic syndrome and its components between 2006 and 2016, Taiwan, with and without adjustment for baseline body mass index.

**Table S4.** Associations of PM<sub>2.5</sub> and NO<sub>2</sub> with metabolic syndrome and its components between 2006 and 2016, Taiwan, with and without adjustment for sleeping time.

**Table S5.** Correlation between PM<sub>2.5</sub> and NO<sub>2</sub> at the township level between 2005 and 2015, Taiwan.

**Figure S1.** Regions of Taiwan. Western Taiwan was essentially the combination of northern, central, and southern regions. Western Taiwan and eastern region are separated by high-rise mountains. This figure was created using the QGIS Desktop software (version 3.22; Open Source Geospatial Foundation, OSGeo).

**Figure S2.** Annual mean concentrations of PM<sub>2.5</sub> (µg/m<sup>3</sup>) and NO<sub>2</sub> (ppb) stratified by regions in the cohorts of metabolic syndrome and its components between 2005 and 2015, Taiwan (N = 93,771). Summary data found in Excel Table S1.

**Figure S3.** Associations between exposure to PM<sub>2.5</sub>, NO<sub>2</sub> and incident metabolic syndrome and its components between 2006 and 2016, in Taiwan, stratified by sex and age (adjusted HR and confidence intervals graphed). Summary data found in Excel Table S2.

**Additional File-** Excel Document
